# Supplementary material for: Fight Against the Mandatory COVID-19 Immunity Passport on Twitter: Natural Language Processing Study
Source: PubMed Central journal article supplement (PMC10669926; doi:10.2196/49435), 2023-11-23
Supplement: jmir_v25i1e49435_app1.pdf [file jmir_v25i1e49435_app1.pdf]

## *Multimedia Appendix 1*

### *Classification Criteria and Definitions*

| <b>Type of classification</b> | <b>Definition</b>                                                                                                                                                         | <b>Translated examples<br/>(French to English)</b>                                                                                                           |
|-------------------------------|---------------------------------------------------------------------------------------------------------------------------------------------------------------------------|--------------------------------------------------------------------------------------------------------------------------------------------------------------|
| <b>Classification 1</b>       |                                                                                                                                                                           |                                                                                                                                                              |
| Unclassifiable                | Unclassifiable or irrelevant for the topic “vaccination” or “sanitary measures”.                                                                                          | The Emmanuel Macron effect.                                                                                                                                  |
| Noncommittal                  | Neutral or without explicit opinion on vaccination and/or on the sanitary pass.                                                                                           | I have to ask my doctor for the vaccine.                                                                                                                     |
| Pro                           | Arguments in favor and/or on the sanitary pass<br>Arguments in favor of the benefits of the COVID-19 vaccine and/or on the sanitary pass (efficiency, safety, relevance). | Personally, I am vaccinated so nothing to fear, on the other hand, good luck to all the anti-vaccine, you will not have the choice now??                     |
| Con                           | Arguments against vaccination or doubts about the effectiveness of the COVID-19 vaccine, fear of side effects and refusal of the sanitary pass.                           | I am against the vaccine I am not afraid of the virus but I am afraid of the vaccine.                                                                        |
| <b>Classification 2</b>       |                                                                                                                                                                           |                                                                                                                                                              |
| Unclassifiable                | Irrelevant or unclassifiable.                                                                                                                                             | A vaccine.                                                                                                                                                   |
| Scientific                    | Scientific or pseudoscientific content that using true beliefs or false information.                                                                                      | The vaccine is 95% efficient, a little less in fragile people. The risk is not zero, but a vaccinated person has much less chance of transmitting the virus. |

| Type of classification | Definition                                                                                                                                                                                            | Translated examples<br>(French to English)                                                                                                                                                                      |
|------------------------|-------------------------------------------------------------------------------------------------------------------------------------------------------------------------------------------------------|-----------------------------------------------------------------------------------------------------------------------------------------------------------------------------------------------------------------|
| Political              | Comments on a legal or political decisions about vaccination or sanitary measures.                                                                                                                    | Basically the vaccine is mandatory, shameful LMAO.                                                                                                                                                              |
| Social                 | Comments, debates or gives an opinion on the report to other members of society.                                                                                                                      | "Pro vaccine" you have to also understand that there is people who does not want to be vaccinated.                                                                                                              |
| Vaccination status     | <p>Explicit tweet about the vaccination status of the tweeter's users.</p> <p>Comments on the symptoms experienced after COVID-19 vaccine injection.</p> <p>Explicit refusing a COVID-19 vaccine.</p> | <p>Ex.1: I am very glad to have already done my 2 doses of the vaccine, fudge.</p> <p>Ex.2: I don't want to get vaccinated. Why? Well, you know, we don't know what's in this vaccine, it can be dangerous.</p> |
