# Supplementary material for: Fight Against the Mandatory COVID-19 Immunity Passport on Twitter: Natural Language Processing Study
Source: PubMed Central journal article supplement (PMC10669926; doi:10.2196/49435), 2023-11-23
Supplement: jmir_v25i1e49435_app2.pdf [file jmir_v25i1e49435_app2.pdf]

## Multimedia Appendix 2

### Number of tweets as a function of the classification 1

| Days      | Non committal | Pros   | Cons   | (Cons - Pros) Differences |
|-----------|---------------|--------|--------|---------------------------|
| July 12   | 13,827        | 19,602 | 23,972 | 22%                       |
| July,13   | 15,524        | 25,363 | 33,327 | 31%                       |
| July 14   | 7,754         | 11,604 | 17,406 | 50%                       |
| July 15   | 6,747         | 10,208 | 15,418 | 51%                       |
| July 16   | 6,228         | 9,654  | 14,016 | 45%                       |
| July 17   | 5,416         | 9,348  | 12,664 | 35%                       |
| July 18   | 5,591         | 8,651  | 13,042 | 51%                       |
| July 19   | 6,030         | 9,156  | 13,277 | 45%                       |
| July 20   | 5,504         | 8,394  | 12,280 | 46%                       |
| July 21   | 5,925         | 9,003  | 12,783 | 42%                       |
| July 22   | 5,525         | 8,298  | 11,687 | 41%                       |
| July 23   | 5,372         | 8,404  | 12,052 | 43%                       |
| July 24   | 4,348         | 7,348  | 10,508 | 43%                       |
| July 25   | 4,790         | 8,017  | 15,313 | 91%                       |
| July 26   | 4,671         | 7,287  | 11,516 | 58%                       |
| July 27   | 5,507         | 8,265  | 13,031 | 58%                       |
| July 28   | 6,411         | 9,205  | 13,813 | 50%                       |
| July 29   | 5,940         | 7,933  | 11,176 | 41%                       |
| July 30   | 5,114         | 7,348  | 11,069 | 51%                       |
| July 31   | 4,375         | 6,837  | 10,578 | 55%                       |
| August 1  | 4,498         | 6,074  | 10,446 | 72%                       |
| August 2  | 5,145         | 6,308  | 10,634 | 69%                       |
| August 3  | 4,332         | 5,561  | 8,743  | 57%                       |
| August 4  | 5,723         | 8,077  | 11,629 | 44%                       |
| August 5  | 5,348         | 6,735  | 10,320 | 53%                       |
| August 6  | 4,764         | 6,499  | 10,613 | 63%                       |
| August 7  | 4,135         | 6,251  | 10,584 | 69%                       |
| August 8  | 3,430         | 5,349  | 9,185  | 72%                       |
| August 9  | 3,964         | 5,349  | 8,757  | 64%                       |
| August 10 | 3,981         | 5,540  | 9,075  | 64%                       |
| August 11 | 4,369         | 5,966  | 10,889 | 83%                       |
