# Supplementary material for: Fight Against the Mandatory COVID-19 Immunity Passport on Twitter: Natural Language Processing Study
Source: PubMed Central journal article supplement (PMC10669926; doi:10.2196/49435), 2023-11-23
Supplement: jmir_v25i1e49435_app3.pdf [file jmir_v25i1e49435_app3.pdf]

### *Multimedia Appendix 3*

#### *Number of tweets as a function of the classification 2*

| <b>Days</b> | <b>Scientific</b> | <b>Political</b> | <b>Social</b> | <b>(Scientific - Political) Difference</b> |
|-------------|-------------------|------------------|---------------|--------------------------------------------|
| July 12     | 14,502            | 21,551           | 18,105        | -33%                                       |
| July 13     | 23,367            | 22,802           | 25,309        | 2%                                         |
| July 14     | 12,677            | 11,017           | 11,789        | 15%                                        |
| July 15     | 12,236            | 9,112            | 9,603         | 34%                                        |
| July 16     | 11,392            | 8,373            | 8,428         | 36%                                        |
| July 17     | 9,657             | 7,952            | 8,510         | 21%                                        |
| July 18     | 10,052            | 8,136            | 8,081         | 24%                                        |
| July 19     | 11,048            | 8,053            | 8,110         | 37%                                        |
| July 20     | 10,349            | 7,634            | 6,615         | 36%                                        |
| July 21     | 10,318            | 8,276            | 7,089         | 25%                                        |
| July 22     | 9,364             | 7,244            | 7,011         | 29%                                        |
| July 23     | 9,753             | 7,739            | 6,621         | 26%                                        |
| July 24     | 8,075             | 6,854            | 6,080         | 18%                                        |
| July 25     | 9,457             | 9,325            | 8,251         | 1%                                         |
| July 26     | 9,091             | 6,861            | 6,415         | 33%                                        |
| July 27     | 11,122            | 6,551            | 7,444         | 70%                                        |
| July 28     | 12,339            | 7,157            | 8,117         | 72%                                        |
| July 29     | 10,568            | 6,036            | 6,581         | 75%                                        |
| July 30     | 10,149            | 5,487            | 6,074         | 85%                                        |
| July 31     | 9,277             | 5,197            | 6,093         | 79%                                        |
| August 1    | 8,450             | 5,860            | 5,811         | 44%                                        |
| August 2    | 8,959             | 6,405            | 5,434         | 40%                                        |
| August 3    | 7,579             | 5,175            | 4,552         | 46%                                        |
| August 4    | 10,219            | 6,445            | 7,440         | 59%                                        |
| August 5    | 8,735             | 6,695            | 5,786         | 30%                                        |
| August 6    | 9,115             | 6,176            | 5,525         | 48%                                        |
| August 7    | 8,740             | 5,565            | 5,853         | 57%                                        |
| August 8    | 7,191             | 5,148            | 5,078         | 40%                                        |
| August 9    | 7,263             | 5,059            | 4,976         | 44%                                        |
| August 10   | 7,435             | 5,175            | 4,968         | 44%                                        |
| August 11   | 8,677             | 6,455            | 5,163         | 34%                                        |
